# Supplementary material
Source: HighWire-hosted journal article supplement (https://mentalhealth.bmj.com/content/26/1/e300700)
Supplement: inline-supplementary-material-1 [file inline-supplementary-material-1.pdf]

1 **ONLINE SUPPLEMENT**2 **Cause-specific excess mortality after first diagnosis of bipolar disorder: population-based cohort study**

3 Tapio Paljärvi, Kimmo Herttua, Heidi Taipale, Markku Lähteenvuo, Antti Tanskanen, Seena Fazel, Jari Tiihonen

4

5 **eTable 1.** The International Classification of Diseases, tenth revision (ICD10), Finnish modification codes used in the  
6 study.

| Description                                                                                                                                                                                                                                                                                                                                                                                                                         | ICD10 codes                                                         |
|-------------------------------------------------------------------------------------------------------------------------------------------------------------------------------------------------------------------------------------------------------------------------------------------------------------------------------------------------------------------------------------------------------------------------------------|---------------------------------------------------------------------|
| Malignant neoplasms (cancer)                                                                                                                                                                                                                                                                                                                                                                                                        | C00 – C98                                                           |
| Diabetes mellitus                                                                                                                                                                                                                                                                                                                                                                                                                   | E10, E11                                                            |
| Alcohol-related causes <sup>a</sup> (mental and behavioural disorders due to use of alcohol, degeneration of nervous system due to alcohol, epileptic seizures related to alcohol, alcoholic polyneuropathy, alcoholic myopathy, alcoholic cardiomyopathy, alcoholic gastritis, alcoholic liver disease, alcohol-induced acute pancreatitis, alcohol-induced chronic pancreatitis, accidental poisoning by and exposure to alcohol) | F10, G312, G4051, G621, G721, I426, K292, K70, K852, K860, X45, Y15 |
| Substance use-related mental and behavioural disorders, other than alcohol                                                                                                                                                                                                                                                                                                                                                          | F11 – F19                                                           |
| Schizophrenia-spectrum disorders                                                                                                                                                                                                                                                                                                                                                                                                    | F20 – F29                                                           |
| Bipolar disorder                                                                                                                                                                                                                                                                                                                                                                                                                    | F30, F31                                                            |
| Cardiovascular diseases                                                                                                                                                                                                                                                                                                                                                                                                             | I00 – I99                                                           |
| Respiratory diseases                                                                                                                                                                                                                                                                                                                                                                                                                | J00 – J99                                                           |
| Other chronic obstructive pulmonary disease (COPD)                                                                                                                                                                                                                                                                                                                                                                                  | J44                                                                 |
| External causes and violence                                                                                                                                                                                                                                                                                                                                                                                                        | V01 – Y89                                                           |
| Accidents                                                                                                                                                                                                                                                                                                                                                                                                                           | V01 – X59                                                           |
| Suicides (intentional self-harm)                                                                                                                                                                                                                                                                                                                                                                                                    | X60 – X84, Y870                                                     |
| Events of undetermined intent                                                                                                                                                                                                                                                                                                                                                                                                       | Y10 – Y34, Y872                                                     |

7 <sup>a</sup>According to Statistics Finland definition.

8

9

10 **eTable 2.** Number of deaths in those aged 65 and above.

| Causes of death                                                                                  | Number of deaths by age group, n (%) |                    |
|--------------------------------------------------------------------------------------------------|--------------------------------------|--------------------|
|                                                                                                  | 65-75 years (n=1066)                 | 65+ years (n=2773) |
| Any somatic cause                                                                                | 934 (88)                             | 2560 (92)          |
| Cardiovascular disease                                                                           | 324 (30)                             | 996 (35)           |
| Diseases of the nervous system, including Alzheimer's disease, dementia, and Parkinson's disease | 99 (9)                               | 663 (23)           |
| Cancer                                                                                           | 270 (25)                             | 478 (17)           |
| Respiratory diseases                                                                             | 73 (7)                               | 164 (6)            |
| Alcohol-related causes                                                                           | 61 (6)                               | 70 (2)             |
| Diabetes                                                                                         | 8 (0.7)                              | 30 (1)             |
| Other somatic causes                                                                             | 33 (3)                               | 159 (6)            |
| Any external cause                                                                               | 132 (12)                             | 213 (8)            |
| Suicides                                                                                         | 66 (6)                               | 80 (3)             |

11 According to The International Classification of Diseases, tenth revision (ICD10), Finnish modification codes

12

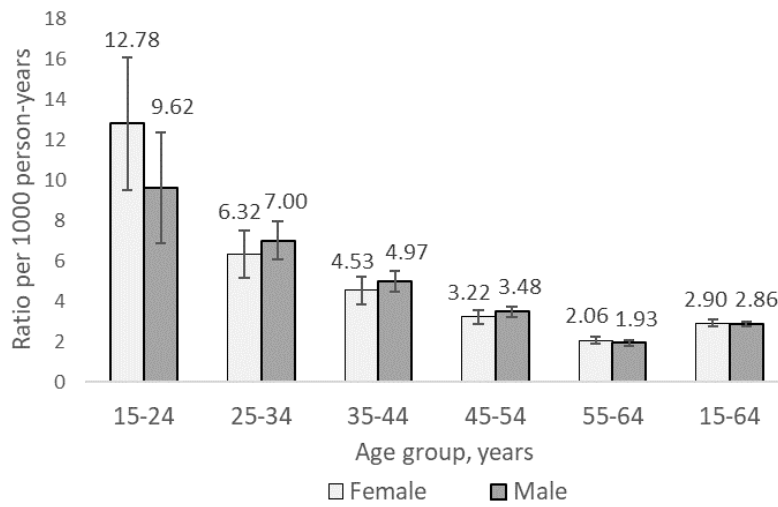

13  
14 **eFigure 1.** Standardised mortality ratios per 1000 person-years for all-cause mortality in individuals with bipolar  
15 disorder during 2004 – 2018 by sex and age group. Finnish general population as a reference. Error bars represent  
16 95% confidence intervals.

17

18 **eTable 3.** Models under which cause-specific mortality would be reduced by 50% in the bipolar disorder population,  
 19 and its effect on relative excess all-cause mortality.

| <b>50% reduction in cause of death category</b>                      | <b>Observed deaths, n</b> | <b>SMR</b> | <b>95%CI</b> | <b>Std rate</b> | <b>Std rate difference<sup>a</sup></b> | <b>Percent reduction</b> |
|----------------------------------------------------------------------|---------------------------|------------|--------------|-----------------|----------------------------------------|--------------------------|
| Baseline, no change                                                  | 3300                      | 2.76       | 2.67, 2.85   | 7.61            | n/a                                    | n/a                      |
| Alcohol-related causes                                               | 3003                      | 2.51       | 2.42, 2.60   | 6.92            | -0.69                                  | -9                       |
| Cardiovascular diseases                                              | 3024                      | 2.53       | 2.44, 2.62   | 6.97            | -0.64                                  | -8                       |
| Alcohol-related causes and cardiovascular diseases                   | 2727                      | 2.28       | 2.19, 2.36   | 6.28            | -1.33                                  | -17                      |
| External causes                                                      | 2664                      | 2.23       | 2.14, 2.31   | 6.14            | -1.47                                  | -19                      |
| External causes and alcohol-related causes                           | 2366                      | 1.98       | 1.90, 2.06   | 5.46            | -2.15                                  | -28                      |
| External causes, alcohol-related causes, and cardiovascular diseases | 2090                      | 1.75       | 1.67, 1.82   | 4.82            | -2.79                                  | -37                      |

20 Reduction applied equally across all age groups. Standardised mortality ratio, SMR; Confidence interval, CI; Non-  
 21 applicable, n/a; Standardised rate in the bipolar disorder population, Std rate. <sup>a</sup>Std rate difference compared to  
 22 baseline. Finnish general population as a reference.  
 23

24 **eTable 4.** Accidental alcohol poisonings included in accidents and deaths due to any external cause, and excluded  
 25 from somatic causes of death.

| Deaths by age group             | Obs. deaths | Exp. deaths | SMR (95%CI)        |
|---------------------------------|-------------|-------------|--------------------|
| Accident <sup>a</sup>           |             |             |                    |
| 15-24                           | 23          | 4           | 5.42 (3.20, 7.63)  |
| 25-34                           | 90          | 16          | 5.48 (4.35, 6.61)  |
| 35-44                           | 142         | 25          | 5.60 (4.68, 6.52)  |
| 45-54                           | 226         | 47          | 4.83 (4.20, 5.46)  |
| 55-64                           | 193         | 63          | 3.07 (2.64, 3.51)  |
| 15-64                           | 674         | 155         | 4.33 (4.01, 4.66)  |
| Any external cause <sup>a</sup> |             |             |                    |
| 15-24                           | 76          | 9           | 8.63 (6.69, 10.57) |
| 25-34                           | 260         | 35          | 7.32 (6.43, 8.21)  |
| 35-44                           | 318         | 46          | 6.85 (6.10, 7.60)  |
| 45-54                           | 449         | 76          | 5.93 (5.38, 6.48)  |
| 55-64                           | 335         | 88          | 3.82 (3.41, 4.23)  |
| 15-64                           | 1438        | 254         | 5.66 (5.37, 5.95)  |
| Any somatic cause <sup>b</sup>  |             |             |                    |
| 15-24                           | 12          | 3           | 4.23 (1.84, 6.63)  |
| 25-34                           | 63          | 21          | 3.06 (2.30, 3.81)  |
| 35-44                           | 185         | 64          | 2.86 (2.45, 3.28)  |
| 45-54                           | 573         | 235         | 2.44 (2.24, 2.64)  |
| 55-64                           | 1029        | 619         | 1.66 (1.56, 1.76)  |
| 15-64                           | 1862        | 942         | 1.98 (1.89, 2.07)  |

26 Observed deaths, Obs. deaths; Expected deaths, Exp. deaths. <sup>a</sup>Including accidental alcohol poisoning. <sup>b</sup>Excluding  
 27 accidental alcohol poisoning, but including other alcohol-related causes.
